# Supplementary material
Source: Springer Nature journal article supplement (https://www.springermedizin.de/resource/supplementary/12889_2011_3729_MOESM1_ESM.pdf/9489954)
Supplement: MOESM1 [file 9489954]

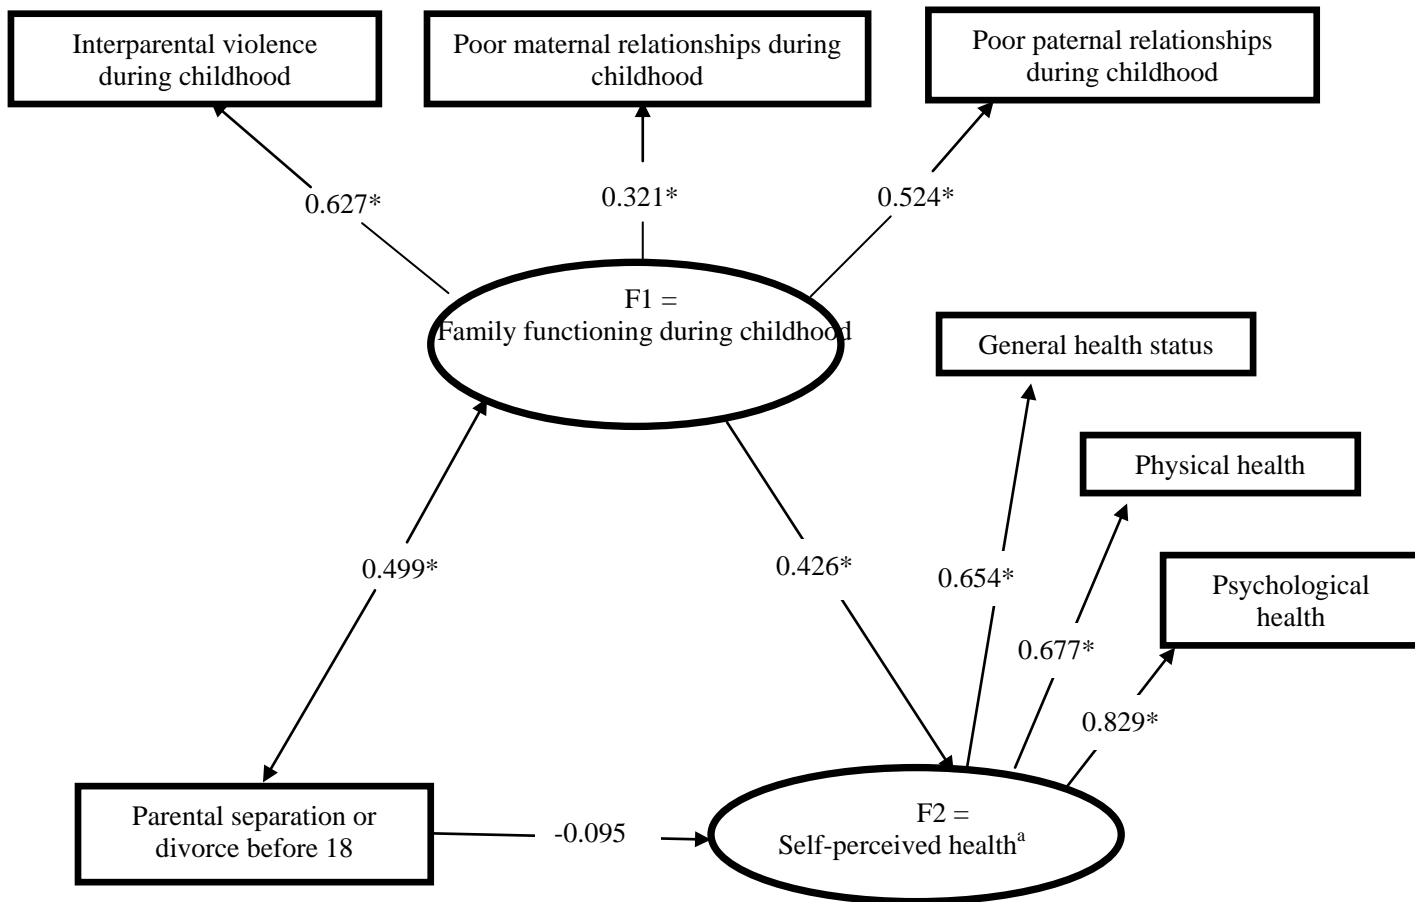

Fit indices of the structural equation model:

Root Mean Square Error of Approximation = 0.041 (0,031-0,05);

Bentler-Bonett non normed fit index = 0.952

<sup>a</sup> adjusted for socio economic status in adulthood (education, socioprofessional status, household income, marital status) and gender

Note. Statistics significant at the 5% level are marked with \*
